# Supplementary material for: Modulation of Microglial Cell Fcγ Receptor Expression Following Viral Brain Infection
Source: PubMed Central journal article supplement (PMC5292951; doi:10.1038/srep41889), 2017-02-06
Supplement: srep41889-s1.pdf [file srep41889-s1.pdf]

# **Modulation of Microglial Cell Fc $\gamma$ Receptor Expression Following Viral Brain Infection**

Priyanka Chauhan, Shuxian Hu, Wen S. Sheng, Sujata Prasad, James R. Lokensgard\*

**Affiliation (for all authors):**

Neurovirology Laboratory, Department of Medicine, University of Minnesota Medical School, Minneapolis, Minnesota (USA)

**\*Corresponding Author**

James R. Lokensgard

Neurovirology Laboratory, Department of Medicine, 3-107 MRF, 689 23<sup>rd</sup> Ave. S.E., Minneapolis, Minnesota (USA) 55455-1507

612-626-9914

E-mail: [loken006@umn.edu](mailto:loken006@umn.edu)

## Supplementary Information

**Supplementary figure 1: mRNA expression of pro-inflammatory and anti-inflammatory markers in brains of uninfected and MCMV-infected mice.** RNA from uninfected and infected brain tissues of C57BL/6 mice was extracted using TRIzol reagent at 0, 5, 30, and 60 dpi and cDNA was synthesized from 1  $\mu$ g of total RNA. Fold change in mRNA expression of (A) IFN $\gamma$ , (B) MHC-II, (C) IL-4 and (D) TGF $\beta$  relative to uninfected control (d 0) was quantified using the  $2^{-\Delta\Delta Ct}$  method and normalized to the housekeeping gene HPRT. Data shown are pooled values of two experiments using 4 mice/experiment. Data were analyzed using one-way analysis of variance (ANOVA) with Tukey's multiple comparison Test (\*\*\*,  $p < 0.001$ ; \*,  $p < 0.05$ ).

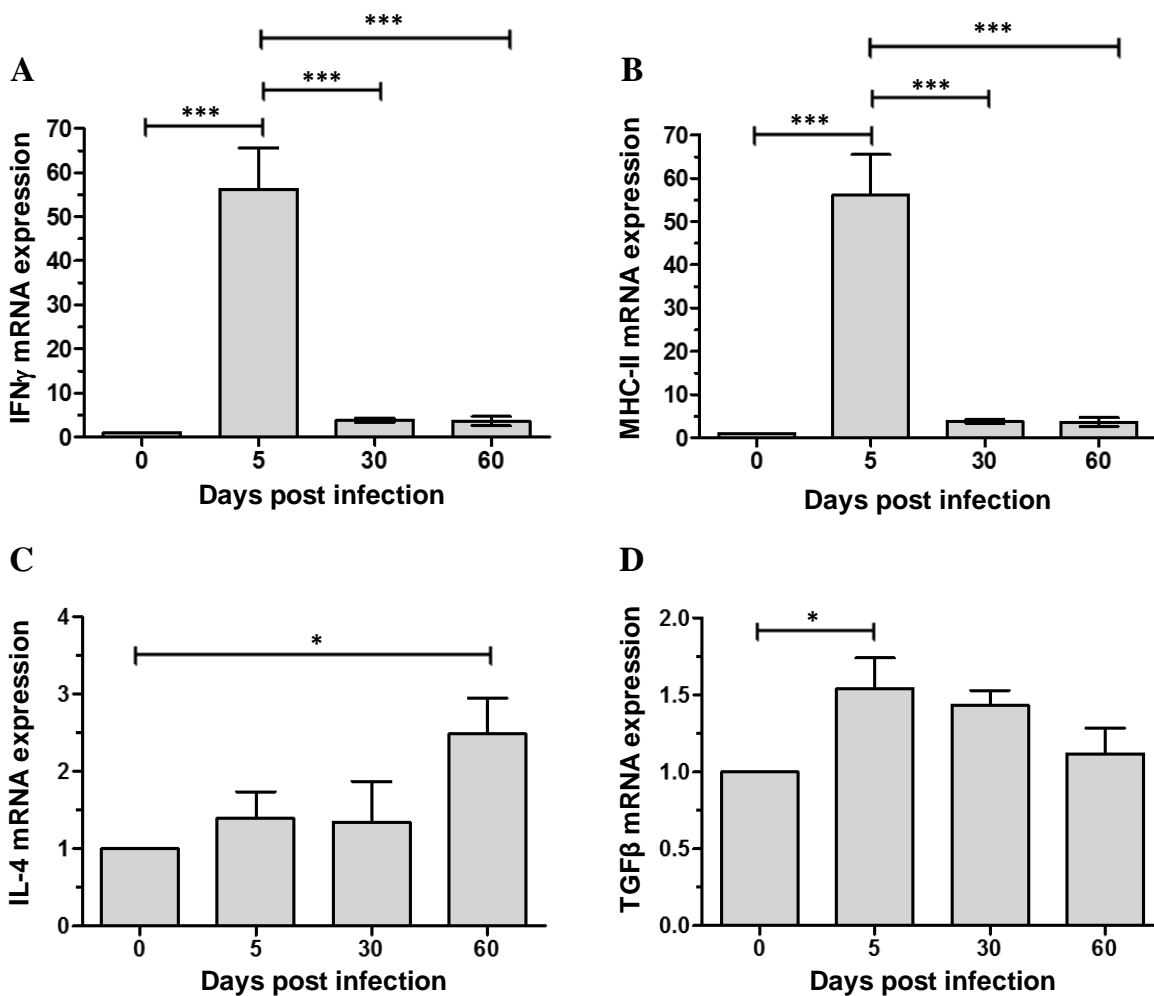

**Supplementary figure 2: *in vitro* microglial cell polarization following IFN $\gamma$  and IL-4**

**treatment.** Primary murine microglial cell cultures were either unstimulated (C) or stimulated with IL-4 or IFN $\gamma$  for 6 h and 24 h. cDNA synthesized from 1  $\mu$ g RNA was amplified and data are expressed as fold change in mRNA expression of the indicated M1/M2 markers (A) iNOS; (B) TNF- $\alpha$ ; (C) CD86; (D) Arginase-1; (E) E-Cadherin and (F) CD206; relative to unstimulated control (quantified using the  $2^{-\Delta\Delta Ct}$  method and normalized to the housekeeping gene HPRT). Data shown are representative of two independent experiments.

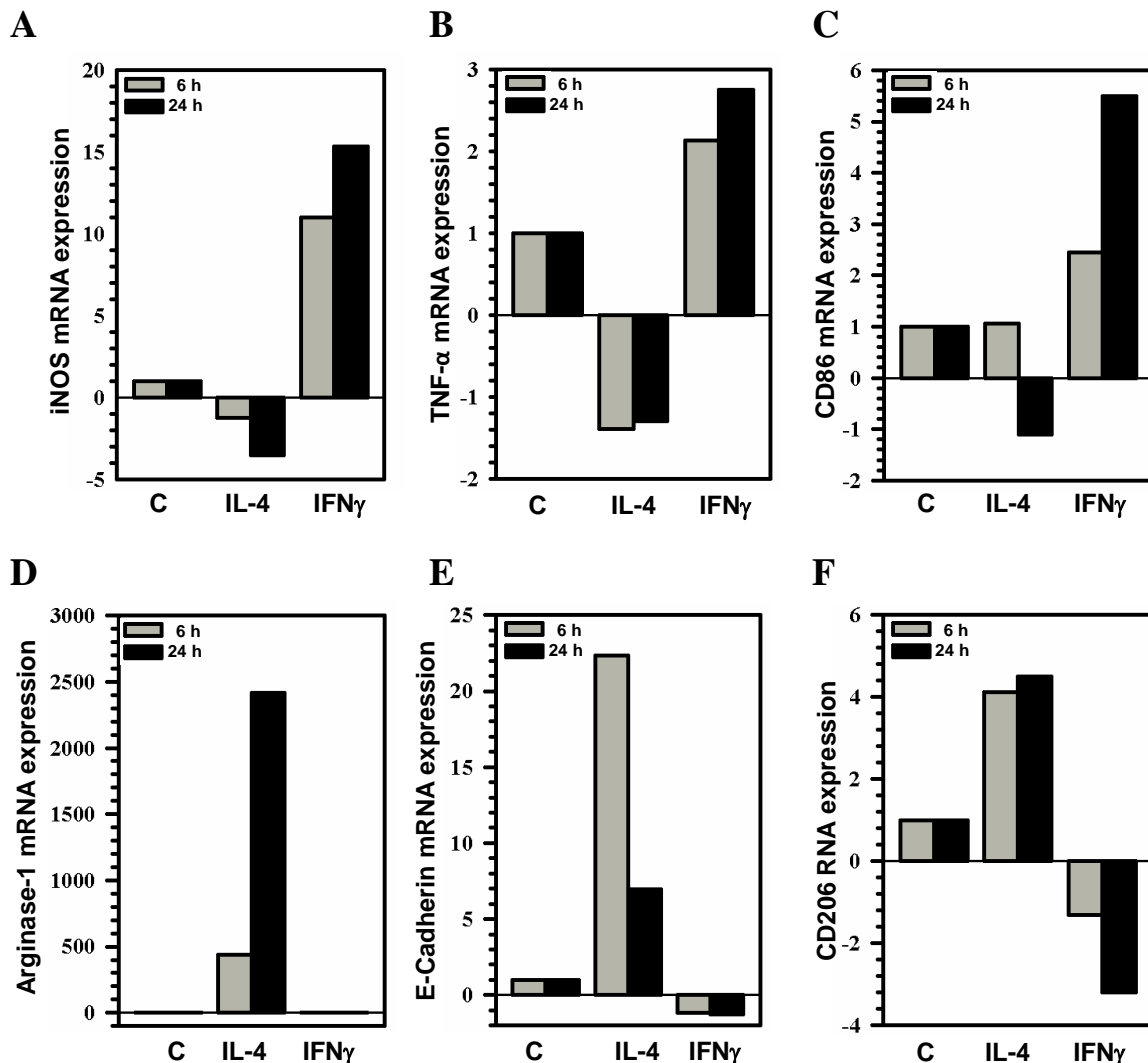

**Supplementary figure 3: mRNA expression of viral IE-1 and E-1 in brains of MCMV-infected mice.** RNA from uninfected and infected brain tissues of C57BL/6 (WT), Fc $\epsilon$ r1g KO, and Fc $\gamma$ R2b KO mice was extracted using TRIzol reagent at 5 dpi and cDNA was synthesized from 1  $\mu$ g of total RNA. Fold change in mRNA expression of IE-1 and E-1 relative to uninfected control (UI) was quantified using the  $2^{-\Delta\Delta Ct}$  method and normalized to the housekeeping gene HPRT. Data shown are pooled values of two experiments using 4 mice/experiment. The data was analyzed using one way analysis of variance (ANOVA) with Tukey's multiple comparison Test (differences between groups were non-significant,  $p > 0.05$ ).

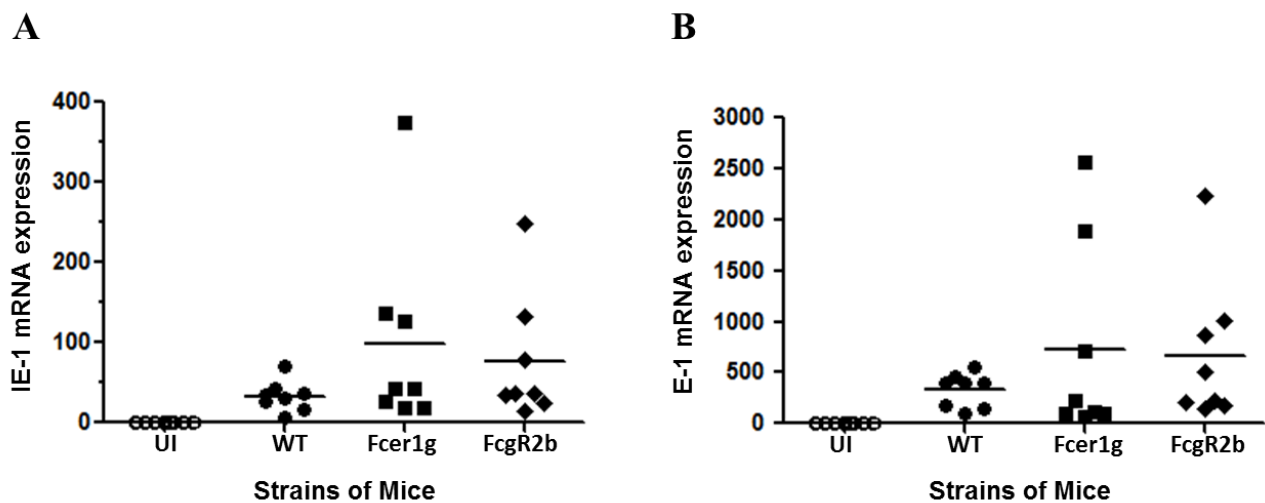

**Supplementary Table 1.** List of mice strains, virus, cell culture and primers used in this study.

| Virus/ Experimental animals<br>Cell line/Primers | Description                                                                                                                                                  | Reference                             |
|--------------------------------------------------|--------------------------------------------------------------------------------------------------------------------------------------------------------------|---------------------------------------|
| <b>Viral strain</b>                              |                                                                                                                                                              |                                       |
| RM461                                            | A recombinant MCMV expressing <i>E. coli</i> $\beta$ -galactosidase under the control of the human ie1/ie2 promoter/enhancer (Stoddart <i>et al</i> , 1994). | kindly provided by Edward S. Mocarski |
| <b>Experimental animals</b>                      |                                                                                                                                                              |                                       |
| C57BL/6                                          | C57BL/6NTac                                                                                                                                                  | Taconic Biosciences                   |
| Fcer1g-Model 583                                 | B6.129P2- <i>Fcer1g</i> <sup>Im1<sup>Rav</sup></sup> N12; mice deficient in the $\gamma$ chain subunit.                                                      | Taconic Biosciences                   |
| FcgR2b-Model 580                                 | B6.129S4-Fcgr2btm1TtkN12; mice deficient in Fc $\gamma$ RIIB protein.                                                                                        | Taconic Biosciences                   |
| <b>Cell culture</b>                              |                                                                                                                                                              |                                       |
| Primary murine microglial cell culture           | Microglial cells cultured from murine cerebral cortical cells from 1-day-old C57BL/6 mice                                                                    | Current study                         |
| <b>Primers</b>                                   |                                                                                                                                                              |                                       |
| F-Fc $\gamma$ RI                                 | <i>Gcggaaagagaagatgctggattc</i>                                                                                                                              | Current study                         |
| R-Fc $\gamma$ RI                                 | <i>cttctctctgcagcctgtgtat</i>                                                                                                                                | Current study                         |
| F-Fc $\gamma$ RIIB                               | <i>gaaaccatcacgctaaggtgcc</i>                                                                                                                                | Current study                         |
| R-Fc $\gamma$ RIIB                               | <i>tggtgcagtgctcctcctagac</i>                                                                                                                                | Current study                         |
| F-Fc $\gamma$ RIII                               | <i>ggtaccacactgctttccct</i>                                                                                                                                  | Current study                         |
| R-Fc $\gamma$ RIII                               | <i>acttcctccagtaatccctcgg</i>                                                                                                                                | Current study                         |
| F-Fc $\gamma$ RIV                                | <i>ccaccgtggcatcaaatcacat</i>                                                                                                                                | Current study                         |
| R-Fc $\gamma$ RIV                                | <i>gtcctgaggttcctgtcccat</i>                                                                                                                                 | Current study                         |
| F-iNOS                                           | <i>tgccacctgttcagctacg</i>                                                                                                                                   | Current study                         |
| R-iNOS                                           | <i>gccaaggccaacacacagata</i>                                                                                                                                 | Current study                         |
| F-TNF- $\alpha$                                  | <i>ctgtgaagggaatgggtgtt</i>                                                                                                                                  | Current study                         |
| R-TNF- $\alpha$                                  | <i>ggtcactgtcccagcatctt</i>                                                                                                                                  | Current study                         |
| F-CD86                                           | <i>gcatatgaccgtgtgtgttct</i>                                                                                                                                 | Current study                         |
| R-CD86                                           | <i>ctctctgtcagcgttactatcccg</i>                                                                                                                              | Current study                         |
| F-Arginase-1                                     | <i>gaacacggcagtggttaac</i>                                                                                                                                   | Current study                         |
| R-Arginase-1                                     | <i>tgcttagctctgtctgttgc</i>                                                                                                                                  | Current study                         |
| F-E-Cadherin                                     | <i>aaccagaacaaagaccaggtgacc</i>                                                                                                                              | Current study                         |
| R-E-Cadherin                                     | <i>cgtagaaacagtaggagcagcagg</i>                                                                                                                              | Current study                         |
| F-CD206                                          | <i>tcctgattgtgatagggtccgg</i>                                                                                                                                | Current study                         |
| R-CD206                                          | <i>ctcattctgctcgtgtgccc</i>                                                                                                                                  | Current study                         |
| F-IFN $\gamma$                                   | <i>gcgtcattgaatcacacctg</i>                                                                                                                                  | Current study                         |
| R-IFN $\gamma$                                   | <i>gacctgtgggtgttgacct</i>                                                                                                                                   | Current study                         |
| F-MHC-II                                         | <i>gacgctcaactgtcccaaac</i>                                                                                                                                  | Current study                         |
| R-MHC-II                                         | <i>gcagccgtgaactgttgaac</i>                                                                                                                                  | Current study                         |
| F-IL-4                                           | <i>cccagctagttgtcatcctgct</i>                                                                                                                                | Current study                         |
| R-IL-4                                           | <i>gttcttctgtgtgtgaggacg</i>                                                                                                                                 | Current study                         |
| F-TGF $\beta$                                    | <i>gcaccatccatgacatgaaccg</i>                                                                                                                                | Current study                         |
| R-TGF $\beta$                                    | <i>aaagtcaatgtacagctgccg</i>                                                                                                                                 | Current study                         |
